# Supplementary material for: The proteome of neutrophils in sickle cell disease reveals an unexpected activation of the interferon alpha signaling pathway
Source: PubMed Central journal article supplement — Haematologica. 2020 Mar 21;105(12):2851–4. doi: 10.3324/haematol.2019.238295 (PMC7716375; doi:10.3324/haematol.2019.238295), 2020-03-21
Supplement: 2019_238295-Disclosures_Contributions.pdf [file 2019_238295-Disclosures_Contributions.pdf]

Haematologica  
HAEMATOL/2019/238295  
Version 3

The proteome of neutrophils in sickle cell disease reveals an unexpected activation of interferon alpha signaling pathway

Patricia Hermand, Slim Azouzi, Emilie-Fleur Gautier, François Guillonneau, Vincent Bondet, Darragh Duffy, Sebastien Dechavanne, Pierre-Louis Tharaux, Patrick Mayeux, Caroline Le Van Kim, and Berengere Koehl

Disclosures: none

Contributions: C.L.V.K., B.K. and P.L.T. designed the project; B.K. contributed to essential material and collected clinical history; P.H., V.B. , S.D. and D.D. performed experiments; E.F.G. and P.M. realized the mass spectrometry and proteomic analysis; P.H., S.A., C.L.V.K. and B.K. analyzed data and discussed the results. P.H., S.A., P.M., C.L.V.K. and B.K. wrote the manuscript.
