# Supplementary material for: The proteome of neutrophils in sickle cell disease reveals an unexpected activation of the interferon alpha signaling pathway
Source: PubMed Central journal article supplement — Haematologica. 2020 Mar 21;105(12):2851–4. doi: 10.3324/haematol.2019.238295 (PMC7716375; doi:10.3324/haematol.2019.238295), 2020-03-21
Supplement: 1052851_suppl.pdf [file 1052851_suppl.pdf]

**The proteome of neutrophils in sickle cell disease reveals an unexpected activation of the interferon alpha signaling pathway**

Patricia Hermand,<sup>1,2</sup> Slim Azouzi,<sup>1,2</sup> Emilie-Fleur Gautier,<sup>2,3</sup> François Guillonneau,<sup>2,3</sup> Vincent Bondet,<sup>4</sup> Darragh Duffy,<sup>4</sup> Sebastien Dechavanne,<sup>1,2</sup> Pierre-Louis Tharaux,<sup>2,5</sup> Patrick Mayeux,<sup>2,3</sup> Caroline Le Van Kim<sup>1,2#</sup> and Berengere Koehl<sup>1,2,6#</sup>

<sup>1</sup>Université de Paris, UMR\_S1134, BICR, Inserm, Institut National de la Transfusion Sanguine; <sup>2</sup>Laboratoire d'Excellence GR-Ex; <sup>3</sup>Université de Paris, UMR\_S1016, UMR 8104, Plateforme de Protéomique (3P5), Institut Cochin, Inserm, CNRS; <sup>4</sup>Immunobiology of Dendritic Cells, Institut Pasteur, Inserm UMR 1223; <sup>5</sup>Université de Paris, Paris Cardiovascular Centre, PARCC, INSERM and <sup>6</sup>Sickle Cell Disease Center, Hematology Unit, Hôpital Robert Debré, Assistance Publique – Hôpitaux de Paris, Paris, France

#CLVK and BK contributed equally as co-senior authors.

Correspondence: BERENGERE KOEHL - [berengere.koehl@inserm.fr](mailto:berengere.koehl@inserm.fr)  
CAROLINE LE VAN KIM - [caroline.le-van-kim@inserm.fr](mailto:caroline.le-van-kim@inserm.fr)

doi:10.3324/haematol.2019.238295

## **Supplementary Methods**

### **Patients and healthy volunteers**

Blood samples were collected on ethylenediamine tetraacetic acid (EDTA) from patients with sickle cell anemia (SS genotype), and from healthy donors (Etablissement Français du Sang). SS patients were children aged 2 to 18 years old, at steady state (no concomitant infection, no acute events in the last month and no blood transfusion within the last 3 months, not treated with hydroxycarbamide). Blood samples used in this study were recovered from blood tubes drawn for medical care, in accordance with French legislation. The study was approved by the French Ethical Committee (CPP 74/18\_3). Biological characteristics of the patients included in the study are summarized in Supplementary Table 2.

### **Human neutrophil isolation**

Human neutrophils were isolated as previously described <sup>4</sup>, using Neutrophil Isolation Kit followed by MACSxpress Erythrocyte Depletion Kit MACSxpress (Miltenyi Biotec, Paris France). The protocol of neutrophil purification was optimized by monitoring two parameters: the CD16 labelling by flow cytometry and the presence of contaminant proteins from RBCs (hemoglobin), platelets (CD41) and lymphocytes (CD3 and CD19). As shown in the proteomic file, none of these proteins was detected in the neutrophils from control and SS patients. In addition, flow cytometry analysis showed that more than 99 % of these cells were CD16-positive.

### **Label free quantification analysis**

Purified PMNs were incubated at 4°C for 5 minutes in 1 mL PBS containing 2mM Diisopropylfluorophosphate (Sigma) to avoid excessive protein degradation during sample preparation. After three washes in cold PBS,  $2 \times 10^6$  neutrophils were lysed and sonicated in 100

$\mu$ l Tris/HCl 100 mM pH8.5, SDS 2%, 1mM PMSF. Then, 50 $\mu$ g of proteins were reduced with 10 mM TCEP, alkylated with 40 mM chloroacetamide and digested with 1  $\mu$ g trypsin using the FASP protocol <sup>1</sup>. Peptides were separated in 5 fractions by strong cationic exchange (SCX) StageTips <sup>2</sup> and analyzed using an Orbitrap Fusion mass spectrometer (Thermo Scientific). Peptides from each SCX fraction were separated on a C18 reverse phase column (2 $\mu$ m particle size, 100 Å pore size, 75 $\mu$ m inner diameter, 25cm length) with a 3hr gradient starting from 99% of solvent A containing 0.1% formic acid, ending in 40% of solvent B containing 80% ACN and 0.085% formic acid. The MS1 scans spanned from 350-1500 m/z with 1.10<sup>6</sup> Automated Gain Control (AGC) target, within 60ms maximum ion injection time (MIIT) and a resolution set to 60,000. In a 3 seconds window, as many Higher energy Collisional Dissociation (HCD) fragmentations as possible were performed on the most abundant ions and subsequently measured in the ion trap (data-dependent acquisition with top speed mode: 3 seconds cycle) with a dynamic exclusion time of 30s. Precursor selection window was set at 1.6 m/z with quadrupole filtering. HCD Normalized Collision Energy was set at 30% and the ion trap scan rate was set to “rapid” mode with AGC target 1.10<sup>5</sup> and 60ms MIIT. The mass spectrometry data were analyzed using Maxquant (v.1.6.1.0) <sup>3</sup>. The database used was a concatenation of human sequences from the Uniprot-Swissprot database (release 2017-05) and the list of contaminant sequences from Maxquant. Cystein carbamidomethylation was set as constant modification and acetylation of protein N-terminus and oxidation of methionine were set as variable modifications. Second peptide search and the “match between runs” (MBR) options were allowed. Label-free protein quantification (LFQ) was done using both unique and razor peptides with at least 2 such peptides required for LFQ. Statistical analysis and data comparison were done using the Perseus software version 1.6.2.3 (Sup Table S1)<sup>4</sup>. The mass spectrometry proteomics data have been deposited to the ProteomeXchange Consortium via the PRIDE partner repository with the dataset identifier PXD014457.

## **Flow Cytometry**

Expression of CD62L and CD64 on purified neutrophils was tested with APC Anti-Human CD62L Antibody (Biolegend – clone DREG-56) and PE Anti-Human CD64 Antibody (Biolegend – clone 10.1).

## **Western Blot Analysis**

Purified neutrophils were lysed in lysis buffer containing 100 mM Tris/HCl (pH8.5), SDS 2%, 1mM PMSF, Phosphatase Inhibitor Cocktail 3 (Sigma - ref P0044), complete EDTA-free (Roche – ref 11 873 580 001). The total protein concentration was determined by the BCA method (Pierce, Thermo Fisher Scientific) and 50 µg of proteins were separated by 4 - 15% SDS– PAGE using TGX Stain-Free Precast Gel (Bio-Rad) under reducing conditions. The gel was imaged using the stain-free application on the ChemiDoc MP (Bio-Rad) imager immediately after the protein separation in order to normalize the loading charge (Figure Sup 1). Blots were probed with anti-Human MX1 (HPA030917 – Sigma 0,4µg/ml), anti-Human IFIT1 (PA3-848 – ThermoFisher Scientific 1:2000), anti-Human ISG15 (MAB 4845 - R&D System 0,5µg/ml), anti-Human Stat 1 (clone 10C4B40 – Biolegend 1µg/ml), anti-Human Stat2 (MAB1666 – R&D Systems 0,2µg/ml), anti-Human Phospho-Stat1 (MAB2894- R&D Systems 0,25µg/ml) and anti-Human Phospho-Stat2 (AF2890 – R&D Systems 0,5µg/ml). Immune complexes were revealed with secondary peroxidase-conjugated antibodies (Abliance) using a chemiluminescent kit (Clarity Western ECL Substrate - Bio-Rad).

## **Quantification of Interferon alpha and beta at the protein level in plasma**

Whole blood was collected from SS patients at steady state and after centrifugation at 5 mn at 3000 rpm, plasma was collected and frozen at -20°C. Interferon alpha (IFN $\alpha$ ) and Interferon beta (IFN $\beta$ ) protein level was quantified using a digital-ELISA assay (SIMOA, Quanterix) developed by Rodero et al <sup>5</sup> for the first dosage and the UMR INSERM 1223 (Institut Pasteur)

for the second. For IFN $\alpha$  quantification, the 8H1 antibody clone was used as a capture antibody, after coating on paramagnetic beads (0.3 mg/ml), and the 12H5 antibody was biotinylated (biotin-to-antibody ratio 30: 1) and used as the detector. Detector and revelation enzyme SBG concentrations were 0,3 ug/mL and 150 pM respectively. For IFN $\beta$  quantification, a mouse anti-human IFN $\beta$  Antibody (PBL Assay Science, Cat No. 710322-9), was used as a capture antibody, after coating on paramagnetic beads (0.3 mg/ml), and a mouse anti-human IFN $\beta$  Antibody (PBL Assay Science, Cat. No. 710323-9) was biotinylated (biotin-to-antibody ratio 40: 1) and used as the detector. Detector and revelation enzyme SBG concentrations were 1 ug/mL and 50 pM respectively. Recombinant IFN $\alpha$ 17/ $\alpha$ I (PBL Assay Science) and IFN $\beta$  (PBL Assay Science) were used to generate a standard curve, after cross-reactivity testing. Each plasma sample was analyzed in duplicate and in dilution 1:6. The limit of detection (LOD) was calculated as the logarithmic mean value +2SD (95% confidence) of reactivity from all blank runs, and found to be 0.10 fg/mL for IFN $\alpha$  and 2.2 pg/mL for IFN $\beta$ , including the dilution factor.

### **PMN elastase and nucleosome detection**

The PMN Elastase and Nucleosome plasma levels were detected using PMN Elastase Human Elisa Kit (ab119553 Abcam) and NU.Q<sup>TM</sup> H3.1 Assay Kit (ACTIVE MOTIF) respectively.

### **References**

1. Gautier EF, Ducamp S, Leduc M, et al. Comprehensive Proteomic Analysis of Human Erythropoiesis. *Cell Rep.* 2016;16(5):1470-1484.
2. Kulak NA, Pichler G, Paron I, Nagaraj N, Mann M. Minimal, encapsulated proteomic-sample processing applied to copy-number estimation in eukaryotic cells. *Nat Methods.* 2014;11(3):319-324.

3. Cox JT, Marginean I, Kelly RT, Smith RD, Tang K. Improving the sensitivity of mass spectrometry by using a new sheath flow electrospray emitter array at subambient pressures. *J Am Soc Mass Spectrom.* 2014;25(12):2028-2037.
4. Koehl B, Nivoit P, El Nemer W, et al. The endothelin B receptor plays a crucial role in the adhesion of neutrophils to the endothelium in sickle cell disease. *Haematologica.* 2017;102(7):1161-72.
5. Rodero MP, Decalf J, Bondet V, et al. Detection of interferon alpha protein reveals differential levels and cellular sources in disease. *J Exp Med.* 2017;214(5):1547-1555.

### Supplementary Figure

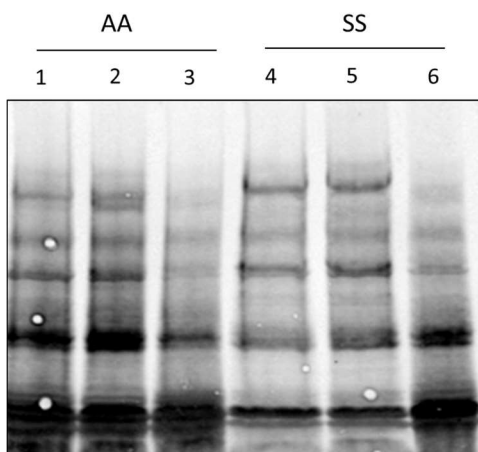

**Figure 1: Representative image of stain free gel after proteins migration (Total protein quantification).**

# Supplementary Tables

**Table S1: Proteins differentially expressed in neutrophils from sickle cell patients (SS) vs healthy controls (AA).**

| Majority protein IDs | Protein names                                                                  | Gene names | AA_1    | AA_2    | AA_3    | AA_4    | SS_1    | SS_2    | SS_3    | SS_4    | Mean AA | Mean SS | -Log Student's T-test p-value SS_AA | Student's T-test Difference SS_AA | SS/AA   |
|----------------------|--------------------------------------------------------------------------------|------------|---------|---------|---------|---------|---------|---------|---------|---------|---------|---------|-------------------------------------|-----------------------------------|---------|
| P09914               | IFN-induced protein with tetratricopeptide repeats 1                           | IFIT1      | 17,6306 | 17,0796 | 16,2158 | 16,9758 | 23,1873 | 24,6123 | 21,9317 | 23,7321 | 16,9755 | 23,3659 | 4,2645                              | 6,3904                            | 83,8890 |
| P29728               | 2-5-oligoadenylate synthase 2                                                  | OAS2       | 17,0016 | 17,2935 | 17,0214 | 18,2788 | 23,2258 | 21,1454 | 22,0749 | 20,3726 | 17,3988 | 21,7047 | 3,1238                              | 4,3058                            | 19,7782 |
| Q460N5               | Poly [ADP-ribose] polymerase 14                                                | PARP14     | 18,2098 | 17,7407 | 17,8754 | 17,7234 | 21,5247 | 21,8790 | 21,4010 | 22,7942 | 17,8873 | 21,8997 | 4,6917                              | 4,0124                            | 16,1384 |
| Q9Y6K5               | 2-5-oligoadenylate synthase 3                                                  | OAS3       | 18,1771 | 18,7753 | 17,4432 | 18,4351 | 23,2829 | 22,3736 | 22,1773 | 20,9838 | 18,2077 | 22,2044 | 3,4578                              | 3,9967                            | 15,9638 |
| P09913               | IFN-induced protein with tetratricopeptide repeats 2                           | IFIT2      | 19,7427 | 19,1782 | 18,0975 | 20,3704 | 21,9375 | 24,9266 | 22,1713 | 23,9141 | 19,3472 | 23,2374 | 2,3911                              | 3,8902                            | 14,8270 |
| Q96PP8               | Guanylate-binding protein 5                                                    | GBP5       | 16,4967 | 18,0774 | 16,6524 | 17,0859 | 19,0098 | 22,8031 | 19,3429 | 22,4778 | 17,0781 | 20,9084 | 1,9415                              | 3,8303                            | 14,2242 |
| P20591               | IFN-induced GTP-binding protein Mx1                                            | MX1        | 20,4169 | 21,6133 | 20,3094 | 19,6485 | 24,0278 | 24,3996 | 23,8484 | 23,5453 | 20,4970 | 23,9553 | 3,6149                              | 3,4583                            | 10,9911 |
| P00973               | 2-5-oligoadenylate synthase 1                                                  | OAS1       | 17,0946 | 19,1196 | 15,5582 | 16,4074 | 20,3866 | 20,2646 | 19,7027 | 19,8545 | 17,0450 | 20,0521 | 2,0832                              | 3,0072                            | 8,0398  |
| P05161               | Ubiquitin-like protein ISG15                                                   | ISG15      | 18,0213 | 20,8144 | 20,0177 | 19,2291 | 21,8059 | 23,9405 | 21,7090 | 22,0424 | 19,5206 | 22,3745 | 1,9392                              | 2,8538                            | 7,2291  |
| Q07617               | Sperm-associated antigen 1                                                     | SPAG1      | 17,6151 | 17,0886 | 16,9808 | 16,2487 | 16,6035 | 20,3178 | 21,2198 | 20,7903 | 16,9833 | 19,7329 | 1,3374                              | 2,7496                            | 6,7252  |
| P12314               | High affinity Ig gamma Fc receptor I/II                                        | FCGR1A/B   | 17,2710 | 16,2445 | 16,8662 | 18,8060 | 19,7422 | 19,9231 | 20,2469 | 19,4608 | 17,2969 | 19,8433 | 2,3721                              | 2,5463                            | 5,8414  |
| O14879               | IFN-induced protein with tetratricopeptide repeats 3                           | IFIT3      | 21,4377 | 20,2648 | 21,5279 | 21,5148 | 23,2633 | 24,2520 | 22,7124 | 24,5943 | 21,1863 | 23,7055 | 2,4904                              | 2,5192                            | 5,7325  |
| Q8TDB6               | E3 ubiquitin-protein ligase DTX3L                                              | DTX3L      | 19,6162 | 20,2100 | 19,6638 | 16,6017 | 21,4904 | 21,4646 | 21,2188 | 21,0403 | 19,0229 | 21,3035 | 1,4855                              | 2,2806                            | 4,8588  |
| Q8NI27               | THO complex subunit 2                                                          | THOC2      | 16,3739 | 15,9833 | 17,6767 | 17,8081 | 19,0663 | 18,9885 | 19,0285 | 19,2648 | 16,9605 | 19,0870 | 2,4282                              | 2,1265                            | 4,3666  |
| Q08380               | Galectin-3-binding protein                                                     | LGALS3BP   | 19,0167 | 18,4537 | 17,0446 | 17,2786 | 21,1594 | 20,1928 | 20,1977 | 18,6709 | 17,9484 | 20,0552 | 1,6313                              | 2,1068                            | 4,3073  |
| P32456               | IFN-induced guanylate-binding protein 2                                        | GBP2       | 19,4783 | 19,5362 | 19,9056 | 19,8705 | 21,0230 | 22,4414 | 21,4366 | 22,0795 | 19,6977 | 21,7451 | 3,0463                              | 2,0475                            | 4,1337  |
| Q9Y3Z3               | Deoxynucleoside 3phosphate 3phosphohydrolase SAMHD1                            | SAMHD1     | 22,8509 | 20,3389 | 21,3191 | 20,7537 | 24,5717 | 23,3856 | 22,3239 | 22,8817 | 21,3157 | 23,2907 | 1,4540                              | 1,9751                            | 3,9316  |
| O95497               | Pantetheinase                                                                  | VNN1       | 24,8357 | 21,4171 | 24,2315 | 22,8256 | 24,8228 | 25,3776 | 25,4256 | 25,4481 | 23,3275 | 25,2685 | 1,3296                              | 1,9411                            | 3,8399  |
| A6NI73               | Leukocyte Ig-like receptor subfamily A member 5                                | LILRA5     | 17,1800 | 19,2376 | 19,8396 | 18,0182 | 20,0378 | 20,5703 | 19,7991 | 20,9649 | 18,5689 | 20,3430 | 1,4579                              | 1,7742                            | 3,4204  |
| P52630               | Signal transducer and activator of transcription 2                             | STAT2      | 18,6623 | 17,5919 | 17,9983 | 17,9429 | 19,3084 | 20,5262 | 19,8268 | 19,6039 | 18,0489 | 19,8163 | 2,6804                              | 1,7675                            | 3,4045  |
| Q6PCE3               | Glucose 1,6-bisphosphate synthase                                              | PGM2L1     | 16,6097 | 18,2502 | 19,2094 | 17,3670 | 19,6927 | 19,4237 | 19,3695 | 19,4010 | 17,8591 | 19,4717 | 1,5341                              | 1,6127                            | 3,0582  |
| Q96A26               | IFN-stimulated gene 20 kDa protein                                             | ISG20      | 19,5721 | 19,9045 | 19,5719 | 19,9634 | 21,5689 | 21,8406 | 20,1762 | 21,7132 | 19,7530 | 21,3247 | 2,1082                              | 1,5718                            | 2,9727  |
| P20592               | IFN-induced GTP-binding protein Mx2                                            | MX2        | 21,5514 | 22,0098 | 21,4505 | 20,3502 | 23,5309 | 22,6182 | 23,0196 | 22,3945 | 21,3405 | 22,8908 | 1,9416                              | 1,5503                            | 2,9288  |
| P16083               | Ribosyl-dihydroxynicotinamide dehydrogenase [quinone]                          | NQO2       | 23,3081 | 24,3284 | 22,6231 | 23,9042 | 24,2649 | 25,0914 | 24,9914 | 25,5506 | 23,5410 | 24,9746 | 1,6987                              | 1,4336                            | 2,7012  |
| P48449               | Lanosterol synthase                                                            | LSS        | 17,2169 | 17,3683 | 17,4552 | 16,2695 | 18,1367 | 18,5761 | 19,4852 | 17,6722 | 17,0775 | 18,4676 | 1,5840                              | 1,3901                            | 2,6209  |
| P42285               | Superkiller viralicidic activity 2-like 2                                      | SKIV2L2    | 19,0474 | 20,0253 | 18,7661 | 20,1490 | 20,4782 | 20,6032 | 21,5389 | 20,3166 | 19,4970 | 20,7342 | 1,5057                              | 1,2373                            | 2,3576  |
| Q96CD2               | Phosphopantothenoylcysteine decarboxylase                                      | PPCDC      | 17,1574 | 17,5528 | 16,3109 | 17,1211 | 18,3835 | 17,5339 | 19,1364 | 17,9563 | 17,0356 | 18,2525 | 1,5241                              | 1,2170                            | 2,3246  |
| P42224               | Signal transducer and activator of transcription 1-alpha/beta                  | STAT1      | 23,0540 | 22,8181 | 22,7244 | 22,7409 | 24,2764 | 24,1472 | 23,5606 | 24,0584 | 22,8344 | 24,0107 | 3,2909                              | 1,1763                            | 2,2599  |
| Q9H0P0               | Cytosolic 5-nucleotidase 3A                                                    | NT5C3A     | 19,3011 | 19,5023 | 18,8220 | 20,4082 | 21,2020 | 20,5248 | 20,3318 | 20,2887 | 19,5084 | 20,5868 | 1,4714                              | 1,0784                            | 2,1117  |
| P15848               | Arylsulfatase B                                                                | ARSB       | 21,1209 | 20,2354 | 20,0379 | 20,1193 | 21,1441 | 22,1369 | 21,1852 | 21,3507 | 20,3784 | 21,4542 | 1,7028                              | 1,0758                            | 2,1079  |
| A6NJG2               | Ankyrin repeat domain-containing protein SOWAHD                                | SOWAHD     | 19,6336 | 18,8184 | 18,3546 | 19,3581 | 20,6143 | 19,9196 | 19,8691 | 19,9175 | 19,0412 | 20,0801 | 1,6712                              | 1,0390                            | 2,0548  |
| P28838               | Cytosol aminopeptidase                                                         | LAP3       | 21,8149 | 21,9839 | 21,8469 | 22,2432 | 23,6003 | 22,6126 | 22,3526 | 23,0350 | 21,9722 | 22,9001 | 1,7340                              | 0,9279                            | 1,9025  |
| Q8IXQ6               | Poly [ADP-ribose] polymerase 9                                                 | PARP9      | 19,4319 | 19,2454 | 18,9366 | 19,8998 | 20,9426 | 20,3751 | 20,3135 | 19,5816 | 19,3784 | 20,3032 | 1,4408                              | 0,9248                            | 1,8984  |
| Q9NX24               | H/ACA ribonucleoprotein complex subunit 2                                      | NHP2       | 17,3472 | 17,4200 | 17,6330 | 17,1373 | 18,3210 | 18,8741 | 17,5471 | 18,2572 | 17,3844 | 18,2499 | 1,6069                              | 0,8655                            | 1,8220  |
| Q63HN8               | E3 ubiquitin-protein ligase RNF213                                             | RNF213     | 21,9781 | 22,3333 | 21,6712 | 22,5042 | 22,9591 | 23,2448 | 22,8147 | 22,9209 | 22,1217 | 22,9849 | 2,2275                              | 0,8632                            | 1,8191  |
| Q9Z785               | Zinc finger protein ubi-d4                                                     | DPF2       | 19,0827 | 19,0579 | 19,4253 | 19,0896 | 19,3996 | 19,8862 | 20,3189 | 20,3410 | 19,1639 | 19,9864 | 1,8652                              | 0,8226                            | 1,7686  |
| P80217               | IFN-induced 35 kDa protein                                                     | IFI35      | 23,1715 | 22,4880 | 22,8614 | 23,3483 | 24,0913 | 23,6633 | 23,3746 | 23,8804 | 22,9673 | 23,7524 | 1,7461                              | 0,7851                            | 1,7232  |
| P46013               | Antigen KI-67                                                                  | MKI67      | 18,1513 | 18,0456 | 18,2313 | 18,5656 | 19,6379 | 19,2215 | 18,4460 | 18,7612 | 18,2485 | 19,0167 | 1,4498                              | 0,7682                            | 1,7032  |
| Q6P2E9               | Enhancer of mRNA-decapping protein 4                                           | EDC4       | 19,0396 | 19,1500 | 19,2026 | 19,1664 | 19,9614 | 19,7695 | 20,0358 | 19,4576 | 19,1397 | 19,8061 | 2,6038                              | 0,6664                            | 1,5871  |
| Q9NUV9               | GTPase IMAP family member 4                                                    | GIMAP4     | 21,7343 | 21,7545 | 21,8816 | 22,4917 | 22,4324 | 22,2917 | 23,1985 | 22,6003 | 21,9655 | 22,6307 | 1,3238                              | 0,6652                            | 1,5858  |
| O43598               | 2-deoxynucleoside 5-phosphate N-hydrolase 1                                    | DNPH1      | 19,4574 | 19,8877 | 19,5328 | 19,1317 | 20,2842 | 20,2606 | 20,2689 | 19,8539 | 19,5024 | 20,1669 | 1,9200                              | 0,6645                            | 1,5851  |
| Q9BR76               | Coronin-1B                                                                     | CORO1B     | 22,1507 | 22,2846 | 21,2500 | 21,9179 | 22,3456 | 22,6384 | 22,6212 | 22,6177 | 21,9008 | 22,5557 | 1,4638                              | 0,6549                            | 1,5746  |
| Q9Y3L3               | SH3 domain-binding protein 1                                                   | SH3BP1     | 23,1940 | 23,3158 | 23,9196 | 23,1087 | 24,0122 | 24,4172 | 23,8051 | 23,8773 | 23,3845 | 24,0280 | 1,5141                              | 0,6434                            | 1,5620  |
| Q03518               | Antigen peptide transporter 1                                                  | TAP1       | 21,7705 | 21,9095 | 22,3633 | 22,0024 | 22,4884 | 22,9625 | 22,4802 | 22,6023 | 22,0114 | 22,6334 | 1,9765                              | 0,6219                            | 1,5389  |
| P42167               | Lamina-associated polypeptide 2, isoforms beta/gamma; Thymopoietin;Thymopentin | TMPO       | 22,3040 | 22,1904 | 22,2848 | 22,1096 | 22,4091 | 23,0824 | 22,5674 | 23,2431 | 22,2222 | 22,8255 | 1,5869                              | 0,6033                            | 1,5192  |
| Q8IY16               | Exocyst complex component 8                                                    | EXOC8      | 19,6101 | 19,8119 | 19,7653 | 19,7945 | 20,6187 | 20,2871 | 20,3841 | 20,0985 | 19,7455 | 20,3471 | 2,6597                              | 0,6017                            | 1,5175  |
| Q9UIA0               | Cytohesin-4                                                                    | CYTH4      | 20,1987 | 19,7985 | 20,3568 | 20,3370 | 20,3266 | 21,1542 | 20,6627 | 20,9468 | 20,1728 | 20,7726 | 1,4537                              | 0,5998                            | 1,5155  |
| Q96IJ7               | Protein disulfide-isomerase TMX3                                               | TMX3       | 19,6739 | 19,9195 | 20,1740 | 20,4406 | 20,2616 | 21,0468 | 20,4993 | 20,7268 | 20,0520 | 20,6336 | 1,3180                              | 0,5816                            | 1,4965  |
| Q04637               | Eukaryotic translation initiation factor 4 gamma 1                             | EIF4G1     | 20,5581 | 20,4764 | 19,7668 | 20,3719 | 20,9488 | 21,0840 | 20,5460 | 20,8940 | 20,2933 | 20,8682 | 1,4482                              | 0,5749                            | 1,4896  |
| Q9Z541               | RNA polymerase-associated protein RTF1                                         | RTF1       | 19,4723 | 19,5159 | 20,0776 | 19,9366 | 20,3481 | 20,4028 | 20,4338 | 20,1172 | 19,7506 | 20,3255 | 1,8587                              | 0,5749                            | 1,4895  |
| O60934               | Nibrin                                                                         | NBN        | 17,9139 | 17,8160 | 17,0775 | 17,2489 | 17,9672 | 18,3550 | 18,1033 | 17,8950 | 17,5141 | 18,0801 | 1,3092                              | 0,5661                            | 1,4805  |
| P05023               | Na/K-transporting ATPase unit alpha-1                                          | ATP1A1     | 23,4059 | 23,8402 | 23,4151 | 23,2076 | 24,1507 | 24,3707 | 23,7792 | 23,7288 | 23,4672 | 24,0074 | 1,4251                              | 0,5401                            | 1,4541  |
| P08567               | Pleckstrin                                                                     | PLEK       | 23,4596 | 23,7550 | 23,8458 | 23,9921 | 23,8524 | 24,3516 | 24,4987 | 24,4370 | 23,7631 | 24,2849 | 1,5160                              | 0,5218                            | 1,4358  |

|               |                                                                  |             |         |         |         |         |         |         |         |         |         |         |        |         |               |
|---------------|------------------------------------------------------------------|-------------|---------|---------|---------|---------|---------|---------|---------|---------|---------|---------|--------|---------|---------------|
| <b>P19525</b> | IFN-induced, double-stranded RNA-activated protein kinase        | EIF2AK2     | 22,4310 | 22,5569 | 22,6624 | 22,4481 | 23,1477 | 22,9944 | 22,5877 | 23,3365 | 22,5246 | 23,0166 | 1,5796 | 0,4920  | <b>1,4064</b> |
| <b>Q8NCW5</b> | NAD(P)H-hydrate epimerase                                        | APOA1BP     | 20,7163 | 20,5159 | 20,2400 | 20,3264 | 21,3158 | 21,0813 | 20,7928 | 20,5720 | 20,4497 | 20,9405 | 1,3478 | 0,4908  | <b>1,4052</b> |
| <b>P42126</b> | Enoyl-CoA delta isomerase 1, mitochondrial                       | EC1         | 21,6078 | 21,6212 | 21,5396 | 21,6420 | 22,0819 | 22,2968 | 22,3479 | 21,6121 | 21,6027 | 22,0847 | 1,5342 | 0,4820  | <b>1,3967</b> |
| <b>Q8TDX7</b> | Serine/threonine-protein kinase Nek7                             | NEK7        | 20,7621 | 20,4995 | 20,8100 | 20,5702 | 21,1515 | 20,9028 | 21,3124 | 21,2002 | 20,6605 | 21,1417 | 2,2523 | 0,4813  | <b>1,3960</b> |
| <b>Q9NPB8</b> | Glycerophosphocholine phosphodiesterase GPCPD1                   | GPCPD1      | 20,0784 | 19,6634 | 19,6284 | 19,5776 | 20,1679 | 20,2976 | 20,4210 | 19,9862 | 19,7370 | 20,2182 | 1,7584 | 0,4812  | <b>1,3959</b> |
| <b>Q9NR97</b> | Toll-like receptor 8                                             | TLR8        | 20,3349 | 20,2876 | 20,2932 | 20,4138 | 21,0846 | 20,7608 | 20,7704 | 20,6136 | 20,3324 | 20,8074 | 2,4314 | 0,4750  | <b>1,3899</b> |
| <b>P55209</b> | Nucleosome assembly protein 1-like 1                             | NAP1L1      | 21,9212 | 21,4764 | 21,6816 | 21,2179 | 22,0545 | 22,3426 | 22,0106 | 21,7647 | 21,5743 | 22,0431 | 1,3071 | 0,4688  | <b>1,3840</b> |
| <b>P23396</b> | 40S ribosomal protein S3                                         | RPS3        | 24,0071 | 24,2700 | 24,2966 | 23,8426 | 24,4695 | 24,8311 | 24,4755 | 24,5083 | 24,1041 | 24,5711 | 1,8114 | 0,4671  | <b>1,3823</b> |
| <b>Q9GZ53</b> | WD repeat-containing protein 61                                  | WDR61       | 21,1732 | 20,9455 | 20,4310 | 20,6475 | 21,3702 | 21,1992 | 21,2836 | 21,0752 | 20,7993 | 21,2321 | 1,3167 | 0,4327  | <b>1,3498</b> |
| <b>P19971</b> | Thymidine phosphorylase                                          | TYMP        | 23,8723 | 24,2279 | 24,4978 | 24,2447 | 24,9407 | 24,4187 | 24,6463 | 24,5299 | 24,2107 | 24,6339 | 1,3199 | 0,4233  | <b>1,3410</b> |
| <b>O75170</b> | Se/thr-protein phosphatase 6 regulatory subunit 2                | PPP6R2      | 17,8641 | 17,9931 | 18,2165 | 17,8105 | 18,6599 | 18,0862 | 18,5889 | 18,2010 | 17,9711 | 18,3840 | 1,3086 | 0,4130  | <b>1,3314</b> |
| <b>P61081</b> | NEDD8-conjugating enzyme Ubc12                                   | UBE2M       | 21,8932 | 21,8126 | 21,6235 | 22,1170 | 22,3110 | 22,2843 | 22,2014 | 22,2918 | 21,8616 | 22,2721 | 2,1024 | 0,4106  | <b>1,3292</b> |
| <b>Q16836</b> | Hydroxyacyl-coenzyme A dehydrogenase, mitochondrial              | HADH        | 22,1748 | 22,4674 | 22,5930 | 22,2766 | 22,9039 | 23,0349 | 22,6637 | 22,4941 | 22,3780 | 22,7742 | 1,3839 | 0,3962  | <b>1,3160</b> |
| <b>P08708</b> | 40S ribosomal protein S17                                        | RPS17       | 22,1169 | 22,7520 | 22,4054 | 22,4855 | 22,9683 | 22,8794 | 22,8060 | 22,6492 | 22,4400 | 22,8257 | 1,4035 | 0,3858  | <b>1,3066</b> |
| <b>Q13547</b> | Histone deacetylase 1                                            | HDAC1       | 21,9185 | 21,7085 | 21,4312 | 21,5484 | 22,0138 | 22,2064 | 22,0788 | 21,8407 | 21,6517 | 22,0349 | 1,5888 | 0,3833  | <b>1,3043</b> |
| <b>Q8IZP0</b> | Abl interactor 1                                                 | ABI1        | 22,8213 | 22,9518 | 23,0852 | 22,9010 | 22,6273 | 22,3108 | 22,4705 | 22,2168 | 22,9398 | 22,4064 | 2,6250 | -0,5335 | <b>0,6909</b> |
| <b>Q8N6G5</b> | Chondroitin sulfate N-acetylgalactosaminyltransferase 2          | CSGALNACT2  | 19,7296 | 20,2416 | 20,0701 | 20,0868 | 19,4466 | 19,8439 | 19,7060 | 18,9834 | 20,0320 | 19,4950 | 1,3110 | -0,5371 | <b>0,6892</b> |
| <b>Q9H4E7</b> | Differentially expressed in FDCP 6 homolog                       | DEF6        | 24,8964 | 25,0351 | 24,8873 | 24,6704 | 24,4424 | 24,4761 | 24,0352 | 24,3445 | 24,8723 | 24,3246 | 2,3234 | -0,5478 | <b>0,6841</b> |
| <b>Q9BS26</b> | Endoplasmic reticulum resident prot 44                           | ERP44       | 23,8473 | 23,6431 | 23,9407 | 23,4472 | 23,3476 | 23,3960 | 23,2108 | 22,7029 | 23,7196 | 23,1643 | 1,5491 | -0,5553 | <b>0,6805</b> |
| <b>Q9UHQ9</b> | NADH-cytochrome b5 reductase 1                                   | CYB5R1      | 20,7390 | 21,2354 | 21,1577 | 21,0397 | 20,7409 | 20,5658 | 20,2656 | 20,3228 | 21,0430 | 20,4738 | 1,9810 | -0,5692 | <b>0,6740</b> |
| <b>Q9UL26</b> | Ras-related protein Rab-22A                                      | RAB22A      | 20,5266 | 20,6231 | 19,9243 | 20,5573 | 19,5694 | 20,0395 | 20,0140 | 19,6594 | 20,4078 | 19,8206 | 1,5650 | -0,5872 | <b>0,6656</b> |
| <b>P16035</b> | Metalloproteinase inhibitor 2                                    | TIMP2       | 21,9818 | 22,3032 | 22,8198 | 22,5434 | 22,0193 | 21,7909 | 21,8805 | 21,5728 | 22,4121 | 21,8159 | 1,5990 | -0,5962 | <b>0,6615</b> |
| <b>Q8TD16</b> | Protein bicaudal D homolog 2                                     | BICD2       | 21,5524 | 21,1111 | 21,0929 | 21,0624 | 21,0548 | 20,8723 | 20,1368 | 20,3025 | 21,2047 | 20,5916 | 1,3081 | -0,6131 | <b>0,6538</b> |
| <b>P51531</b> | Probable global transcription activator SNF2L2                   | SMARCA2     | 21,6360 | 21,5468 | 21,5106 | 21,2147 | 21,0025 | 20,6291 | 21,2804 | 20,4937 | 21,4770 | 20,8514 | 1,6830 | -0,6256 | <b>0,6482</b> |
| <b>Q8IWB1</b> | Inositol 1,4,5-trisphosphate receptor-interacting protein        | ITPRIP      | 22,4264 | 22,2500 | 22,7764 | 21,9612 | 21,6123 | 21,8092 | 21,9834 | 21,4464 | 22,3535 | 21,7128 | 1,6758 | -0,6407 | <b>0,6414</b> |
| <b>Q9HC1</b>  | Spermatogenesis-defective protein 39 homolog                     | VIPAS39     | 18,8040 | 18,6583 | 18,8868 | 18,7271 | 17,8680 | 18,1415 | 18,6365 | 17,8650 | 18,7691 | 18,1278 | 1,8437 | -0,6413 | <b>0,6411</b> |
| <b>P14151</b> | <b>L-selectin</b>                                                | <b>SELL</b> | 22,4399 | 22,1500 | 22,5939 | 23,1440 | 22,1385 | 21,8365 | 21,5070 | 22,1769 | 22,5820 | 21,9147 | 1,3687 | -0,6673 | <b>0,6297</b> |
| <b>B01172</b> | Unconventional myosin-Ig;Minor histocompatibility Ag HA-2        | MYO1G       | 24,5158 | 24,7384 | 24,7477 | 24,6020 | 23,9951 | 23,5076 | 24,1826 | 24,2383 | 24,6510 | 23,9809 | 2,0587 | -0,6701 | <b>0,6285</b> |
| <b>Q96F46</b> | Interleukin-17 receptor A                                        | IL17RA      | 19,7837 | 19,2913 | 19,7885 | 19,3368 | 19,1617 | 18,6373 | 18,5727 | 19,0527 | 19,5501 | 18,8561 | 1,8681 | -0,6940 | <b>0,6181</b> |
| <b>Q13231</b> | Chitotriosidase-1                                                | CHIT1       | 25,9270 | 26,2744 | 26,4691 | 26,1441 | 24,9679 | 25,8165 | 25,4025 | 25,6878 | 26,2037 | 25,4687 | 1,8085 | -0,7350 | <b>0,6008</b> |
| <b>Q9NX63</b> | MICOS complex subunit MIC19                                      | CHCHD3      | 21,3488 | 21,1412 | 21,5205 | 21,3281 | 20,9324 | 20,8734 | 20,1521 | 20,3876 | 21,3347 | 20,5864 | 1,9739 | -0,7482 | <b>0,5953</b> |
| <b>P36969</b> | Phospholipid hydroperoxide glutathione peroxidase, mitochondrial | GPX4        | 21,1484 | 21,7407 | 21,2892 | 22,0126 | 21,0726 | 20,2065 | 21,0936 | 20,7592 | 21,5477 | 20,7830 | 1,4249 | -0,7647 | <b>0,5886</b> |
| <b>O15269</b> | Serine palmitoyltransferase 1                                    | SPTLC1      | 19,3018 | 19,8295 | 19,7621 | 20,2439 | 19,1124 | 18,5471 | 19,5232 | 18,6315 | 19,7843 | 18,9536 | 1,4996 | -0,8308 | <b>0,5622</b> |
| <b>Q9Y6D9</b> | Mitotic spindle assembly checkpoint protein MAD1                 | MAD1L1      | 18,4612 | 18,6761 | 18,9210 | 18,9878 | 17,4297 | 18,1385 | 18,3257 | 17,7621 | 18,7615 | 17,9140 | 1,9636 | -0,8475 | <b>0,5557</b> |
| <b>P54803</b> | Galactocerebrosidase                                             | GALC        | 20,7814 | 19,9461 | 19,6193 | 19,6413 | 19,0791 | 18,9975 | 19,3598 | 19,0906 | 19,9970 | 19,1318 | 1,6513 | -0,8653 | <b>0,5489</b> |
| <b>P02766</b> | Transthyretin                                                    | TTR         | 20,6680 | 21,5788 | 21,4412 | 20,8077 | 20,0284 | 20,5664 | 20,0756 | 20,2534 | 21,1239 | 20,2310 | 1,8772 | -0,8930 | <b>0,5385</b> |
| <b>P02647</b> | Apolipoprotein A-I;Proapolipoprotein A-I                         | APOA1       | 24,0277 | 23,7420 | 24,0567 | 23,9971 | 22,5193 | 23,7640 | 22,6651 | 23,1110 | 23,9559 | 23,0149 | 1,7623 | -0,9411 | <b>0,5208</b> |
| <b>P19484</b> | Transcription factor EB                                          | TFEB        | 19,6419 | 20,4104 | 19,9601 | 20,1108 | 19,4729 | 18,2499 | 19,0317 | 19,2418 | 20,0308 | 18,9991 | 1,8008 | -1,0318 | <b>0,4891</b> |
| <b>P61313</b> | 60S ribosomal protein L15                                        | RPL15       | 20,2370 | 19,5332 | 20,2734 | 19,6657 | 17,7118 | 19,3875 | 19,0635 | 18,9136 | 19,9273 | 18,7691 | 1,5087 | -1,1583 | <b>0,4481</b> |
| <b>Q148N4</b> | Sarcolemmal membrane-associated protein                          | SLMAP       | 19,8176 | 20,2104 | 19,8138 | 20,7223 | 18,9587 | 18,4436 | 18,4837 | 19,2567 | 20,1410 | 18,7857 | 2,4607 | -1,3554 | <b>0,3908</b> |
| <b>Q53FT3</b> | Protein Hikeshi                                                  | C11orf73    | 20,1191 | 20,8815 | 20,2166 | 20,9114 | 20,6166 | 18,2176 | 18,4650 | 19,0190 | 20,5322 | 19,0796 | 1,3375 | -1,4526 | <b>0,3654</b> |
| <b>Q8N1B4</b> | Vacuolar protein sorting-associated protein 52 homolog           | VP52        | 18,9368 | 20,0679 | 19,2876 | 20,1531 | 18,4672 | 18,9580 | 17,6187 | 17,2739 | 19,6114 | 18,0795 | 1,7009 | -1,5319 | <b>0,3458</b> |
| <b>P61244</b> | Protein max                                                      | MAX         | 20,2986 | 20,9458 | 20,0359 | 20,0058 | 18,9281 | 17,2074 | 18,8988 | 20,0637 | 20,3215 | 18,7745 | 1,3114 | -1,5470 | <b>0,3422</b> |
| <b>P01008</b> | Antithrombin-III                                                 | SERPINC1    | 18,2219 | 20,3870 | 19,1727 | 18,5176 | 17,7143 | 17,2942 | 17,3212 | 17,0635 | 19,0748 | 17,3483 | 1,8706 | -1,7265 | <b>0,3022</b> |
| <b>Q99627</b> | COP9 signalosome complex subunit 8                               | COPS8       | 19,1007 | 18,5057 | 18,8823 | 18,8904 | 19,1331 | 16,3659 | 16,0797 | 16,8084 | 18,8448 | 17,0968 | 1,3180 | -1,7480 | <b>0,2977</b> |
| <b>Q9HCC0</b> | Methylcrotonoyl-CoA carboxylase beta chain, mitochondrial        | MCCC2       | 19,4584 | 18,3582 | 17,7548 | 18,5053 | 17,0523 | 15,8861 | 16,8560 | 17,1724 | 18,5192 | 16,7417 | 2,0872 | -1,7775 | <b>0,2917</b> |
| <b>Q9UNL2</b> | Translocon-associated protein subunit gamma                      | SSR3        | 17,4809 | 18,8660 | 19,9545 | 18,9434 | 17,6980 | 16,7075 | 16,2196 | 15,7090 | 18,8112 | 16,5835 | 1,8212 | -2,2277 | <b>0,2135</b> |
| <b>Q01629</b> | IFN-induced transmembrane protein 2                              | IFITM2      | 24,2082 | 23,8126 | 25,0992 | 24,3506 | 16,1419 | 16,5493 | 16,3932 | 24,8603 | 24,3677 | 18,4862 | 1,4743 | -5,8815 | <b>0,0170</b> |



**Table S2:** Hematological parameters of SS patients with low and high IFN $\alpha$  levels

|                                             | Low IFN $\alpha$ level (<0.12 fg/mL)<br>(n=17) | High IFN $\alpha$ level (>0.12 fg/mL)<br>(n=20) | <i>P</i> |
|---------------------------------------------|------------------------------------------------|-------------------------------------------------|----------|
| <b>Age (years)</b>                          | 10.28 [4.55-14.48]                             | 9.19 [4.07-14.31]                               | 0.53     |
| <b>Hb level (g/dl)</b>                      | 8.84 [7.67-10.01]                              | 8.24 [7.26-9.22]                                | 0.33     |
| <b>Leucocyte count (/mm<sup>3</sup>)</b>    | 14,700 [7,400-22,000]                          | 11,300 [7,600-15,000]                           | 0.15     |
| <b>Platelet count (/mm<sup>3</sup>)</b>     | 360,700 [176,400-545,000]                      | 263,700 [91,300-436,000]                        | 0.55     |
| <b>Neutrophil count (/mm<sup>3</sup>)</b>   | 5,970 [3,990-8,940]                            | 5,750 [4,090-7,400]                             | 0.82     |
| <b>Reticulocyte count (/mm<sup>3</sup>)</b> | 297,370 [157,820-436,930]                      | 258,100 [186,800-329,300]                       | 0.53     |
